# Supplementary material
Source: publisher figshare collection journal article supplement (https://frontiersin.figshare.com/ndownloader/files/24537230)
Supplement: Supplementary file [file 24537230]

## *Supplementary Material*

### **Caffeine Targets SIRT3 to Enhance SOD2 Activity in Mitochondria**

**Huanhuan Xu<sup>1,2†</sup>, Chunxia Gan<sup>1,3†</sup>, Ziqi Gao<sup>1,3</sup>, Yewei Huang<sup>1,2</sup>, Simin Wu<sup>1,3</sup>, Dongying Zhang<sup>1,2\*</sup>, Xuanjun Wang<sup>1,2,4\*</sup> and Jun Sheng<sup>1,4\*</sup>**

**\*Correspondence to:** Key Laboratory of Pu-er Tea Science, Ministry of Education, Yunnan Agricultural University, No. 452, Fengyuan Road, Panlong District, Kunming 650201, China. E-mail addresses: 757664982@qq.com (Dongying Zhang); jwang@ynau.edu.cn (Xuanjun Wang); shengj@ynau.edu.cn (Jun Sheng).

<sup>†</sup>These authors contributed equally to this work.

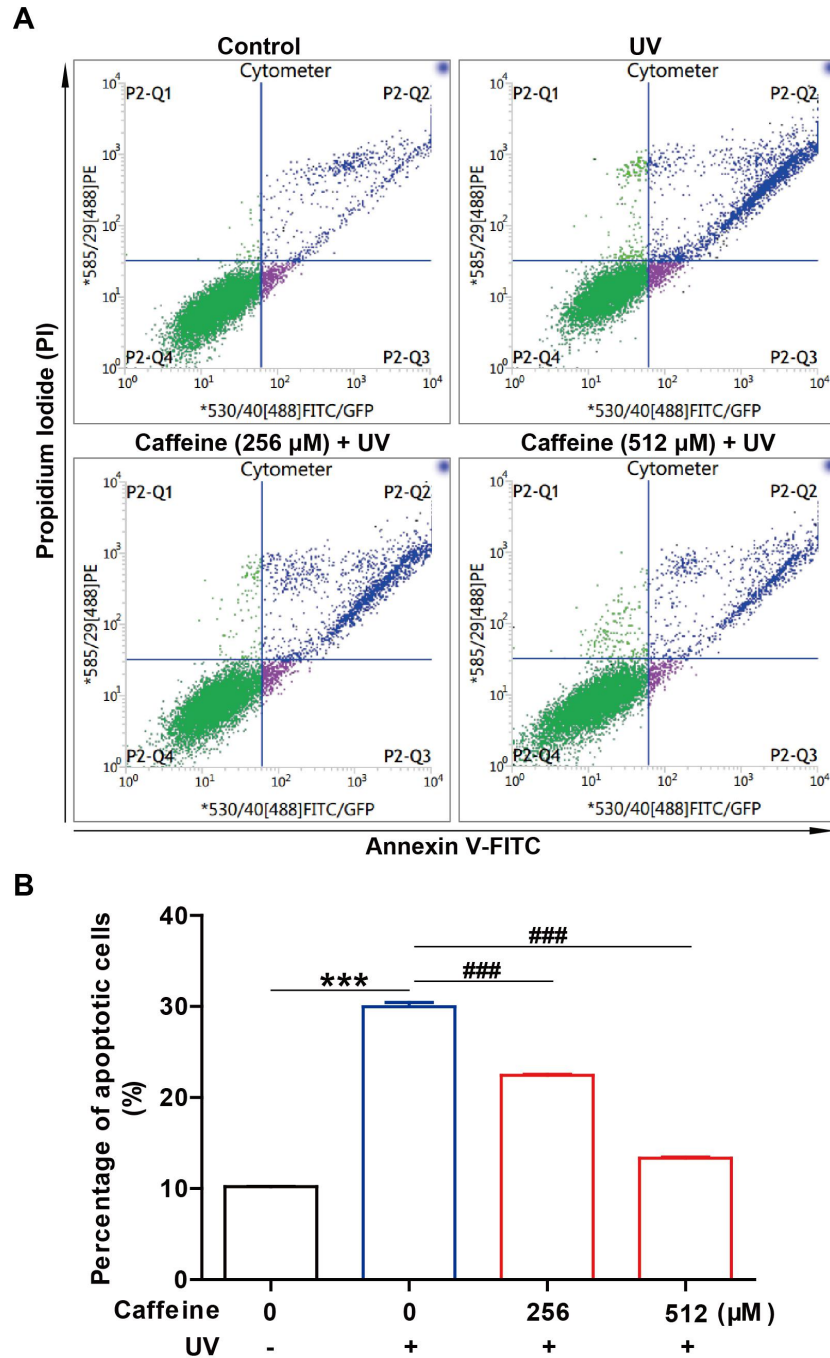

**Supplementary Figure 1.** Caffeine inhibits UV irradiation-induced apoptosis in HaCaT cells. **(A)** Flow cytometry was used to detect cell apoptosis in UV-irradiated HaCaT cells treated with various concentrations of caffeine. **(B)** The ratio of apoptotic cells in each group are expressed as percentages. Data are expressed as the mean  $\pm$  SEM of three independent experiments. \*\*\* $P < 0.001$  vs. the control; ### $P < 0.001$  vs. UV irradiation only.

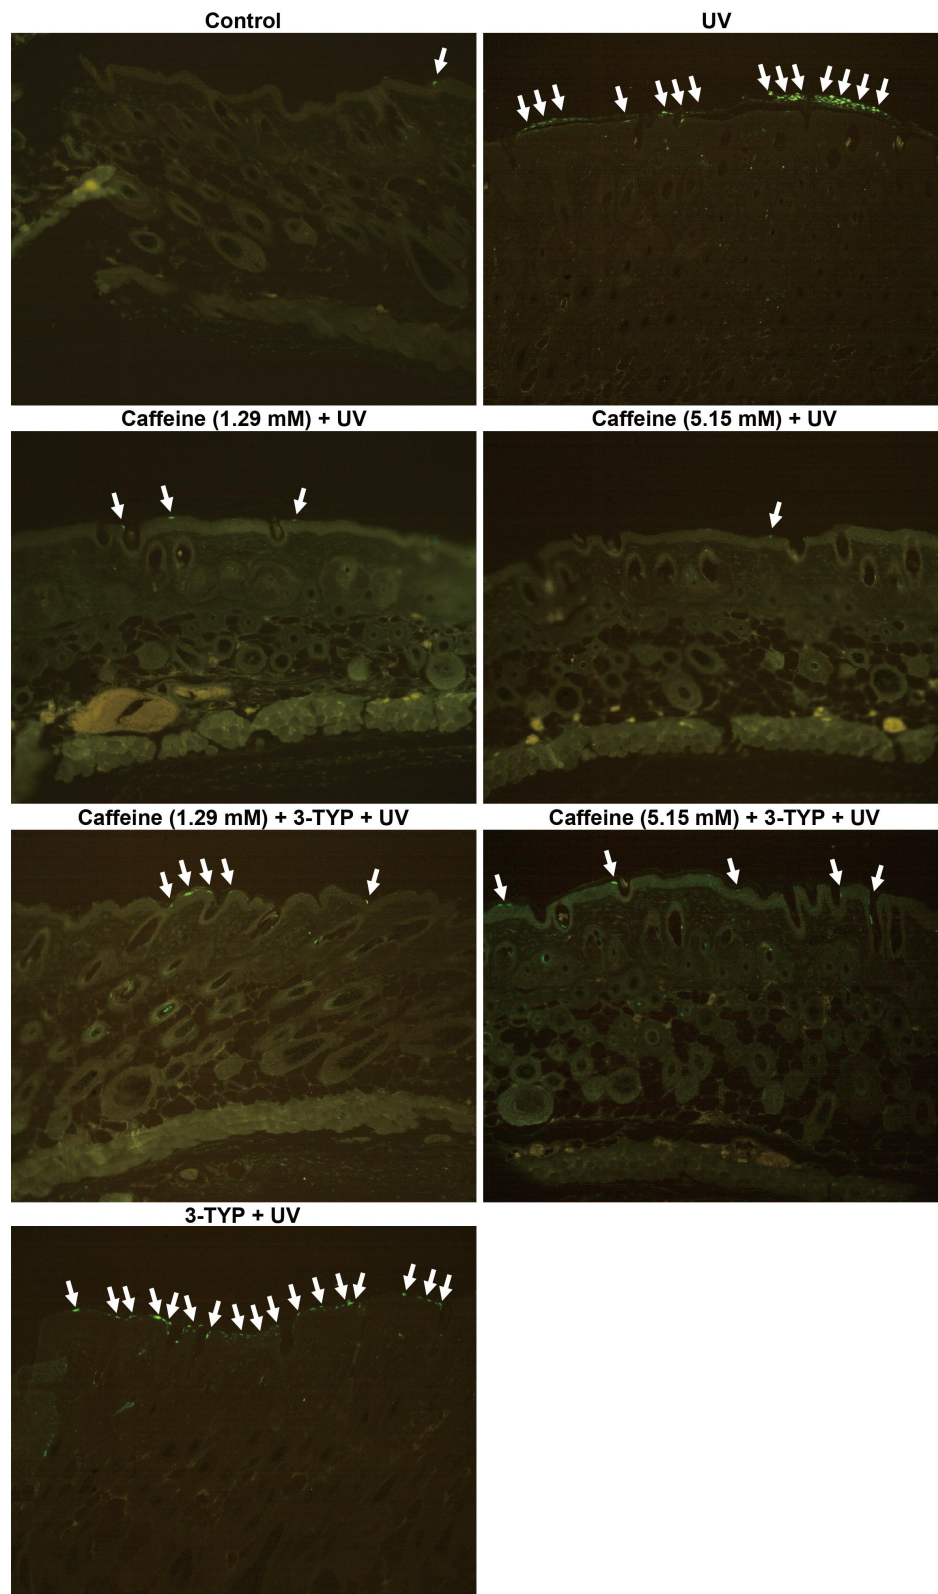

**Supplementary Figure 2.** Caffeine effectively inhibits apoptosis in UV-irradiated mouse skin. Apoptosis in mouse skin sections was examined by TUNEL staining and images were captured at  $\times 100$  magnification. The green fluorescence represents apoptotic cells.
